# Supplementary material for: Differing pre-industrial cooling trends between tree-rings and lower-resolution temperature proxies
Source: Copernicus journal article supplement (doi:10.5194/cp-2019-41), 2019-04-04
Supplement: Supplementary file 1 [file cp-2019-41-supplement.pdf]

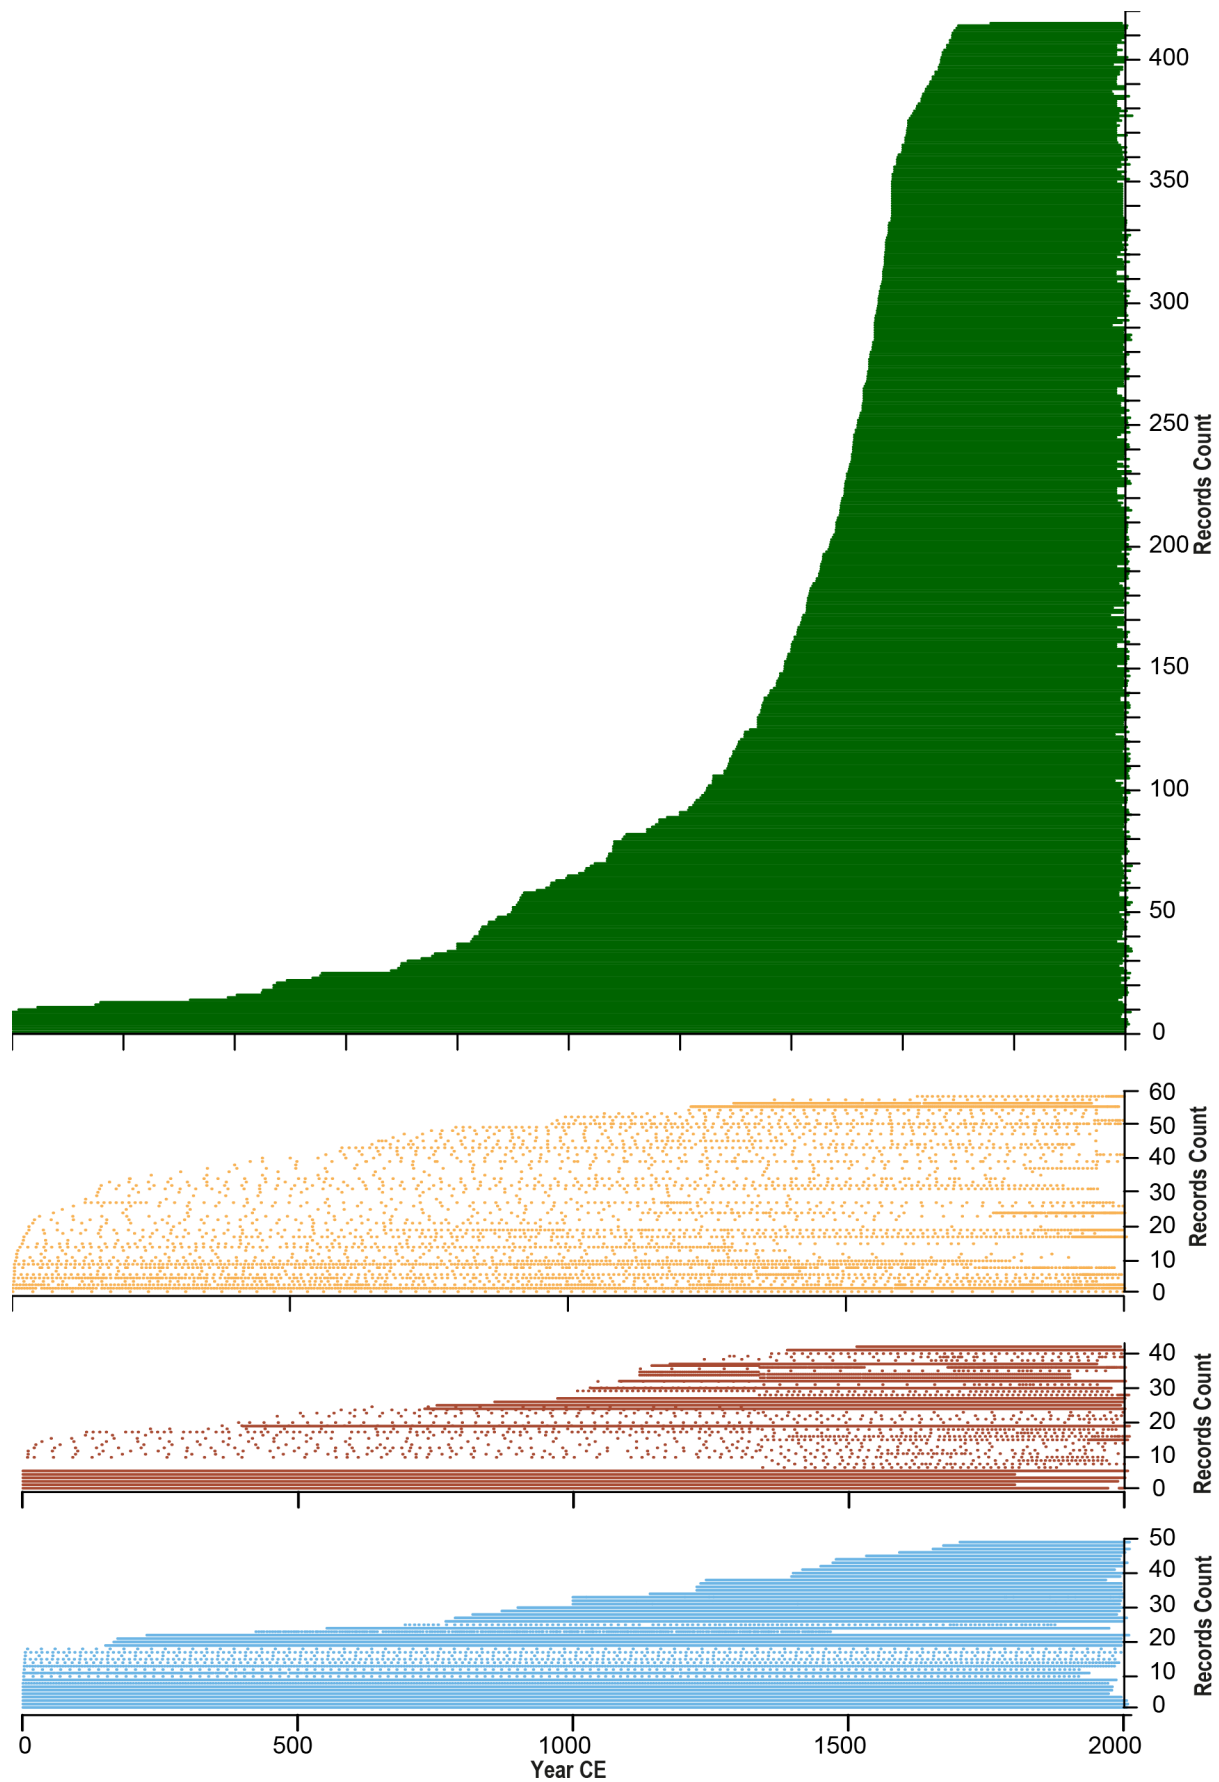

**Fig. S1.** Temporal distribution and resolution of the tree-ring (green), lake sediment (red), marine sediment (orange) and glacier ice (blue) proxy records from the PAGES 2k 2.0.0 database. (Dashed) lines indicate proxy resolution ranging between sub-annual and 145 years.

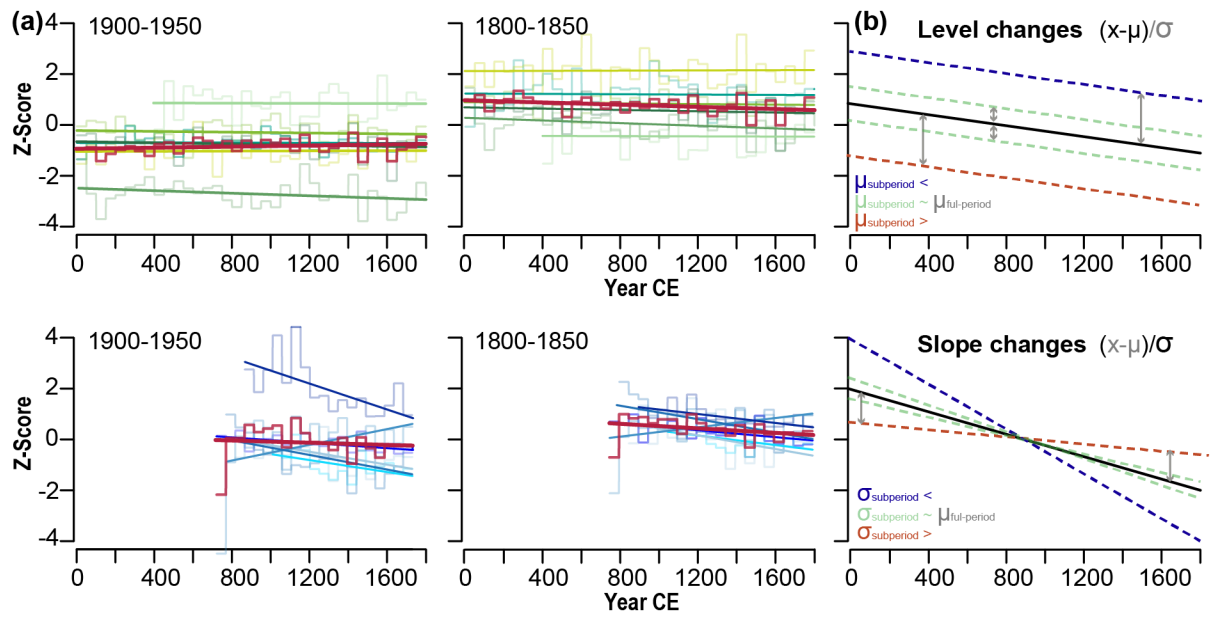

**Fig. S2. (a)** Differently normalized tree-ring records (green, blue), their chronology means (red) and corresponding pre-industrial temperature trends (1-1800 CE) and **(b)** explanation, why level and slope change dependent on the period chosen for tree-ring normalization.
